# Supplementary material for: Patterns of conservation of spliceosomal intron structures and spliceosome divergence in representatives of the diplomonad and parabasalid lineages
Source: PubMed Central journal article supplement (PMC6679479; doi:10.1186/s12862-019-1488-y), 2019-08-02
Supplement: 12862_2019_1488_MOESM9_ESM.pdf [file 12862_2019_1488_MOESM9_ESM.pdf]

| Sub-complex          | Protein          | Hs | Sc | At | Gi | T | Ss | Kb | M |
|----------------------|------------------|----|----|----|----|---|----|----|---|
| A                    | BUB3             | 1  | 1  | 1  | 1  | 1 | 1  | 1  | 1 |
| A                    | CDK11A_CDC2L2    | 1  | 0  | 1  | 1  | 1 | 0  | 1  | 1 |
| A                    | DDX17_p72        | 1  | 1  | 1  | 1  | 1 | 0  | 1  | 1 |
| A                    | DDX5             | 1  | 1  | 1  | 1  | 1 | 0  | 1  | 1 |
| A                    | RBM10            | 1  | 0  | 1  | 0  | 0 | 0  | 0  | 1 |
| A                    | RBM39            | 1  | 0  | 1  | 0  | 0 | 0  | 0  | 0 |
| A                    | SF1              | 1  | 1  | 1  | 0  | 0 | 0  | 0  | 0 |
| A                    | SUGP1            | 1  | 0  | 1  | 0  | 0 | 0  | 0  | 0 |
| A                    | tatSF1           | 1  | 1  | 1  | 0  | 0 | 0  | 0  | 0 |
| Bact                 | CCDC12_MGC23918  | 1  | 0  | 1  | 0  | 0 | 0  | 0  | 0 |
| Bact                 | PPIL2            | 1  | 0  | 1  | 0  | 0 | 0  | 0  | 0 |
| B                    | Kin17            | 1  | 0  | 1  | 0  | 0 | 0  | 0  | 1 |
| B                    | MFAP1            | 1  | 0  | 1  | 0  | 0 | 0  | 0  | 1 |
| B                    | Smu1             | 1  | 1  | 1  | 1  | 1 | 0  | 1  | 1 |
| B                    | UBL5             | 1  | 1  | 1  | 1  | 1 | 1  | 0  | 1 |
| C2                   | CDK10            | 1  | 0  | 1  | 1  | 1 | 1  | 1  | 1 |
| C2                   | DGCR14           | 1  | 0  | 1  | 0  | 0 | 0  | 0  | 1 |
| C2                   | FRA10AC1         | 1  | 0  | 1  | 0  | 0 | 0  | 0  | 1 |
| C2                   | GNB2LI_RACK1     | 1  | 1  | 1  | 1  | 1 | 1  | 1  | 1 |
| C2                   | HSP70_HSPA1A     | 1  | 1  | 1  | 1  | 1 | 1  | 1  | 1 |
| C2                   | NKAP             | 1  | 0  | 1  | 0  | 0 | 0  | 0  | 0 |
| CBPProteins          | CBP20            | 1  | 1  | 1  | 1  | 1 | 1  | 1  | 1 |
| CBPProteins          | CBP80            | 1  | 1  | 1  | 0  | 0 | 0  | 0  | 0 |
| C                    | C19orf29_CACTIN  | 1  | 0  | 1  | 0  | 0 | 0  | 0  | 0 |
| C                    | C1orf55_FLJ35382 | 1  | 0  | 1  | 0  | 0 | 0  | 0  | 0 |
| C                    | C9orf78_HSPC220  | 1  | 0  | 1  | 0  | 0 | 0  | 0  | 1 |
| C                    | DDX35            | 1  | 1  | 1  | 1  | 0 | 1  | 1  | 1 |
| C                    | DDX41            | 1  | 1  | 1  | 0  | 0 | 0  | 0  | 1 |
| C                    | GPATCH1_Q9BRR8   | 1  | 0  | 1  | 0  | 0 | 0  | 0  | 1 |
| C                    | NOSIP            | 1  | 0  | 1  | 0  | 0 | 0  | 0  | 0 |
| C                    | PPIG             | 1  | 0  | 1  | 1  | 1 | 1  | 1  | 1 |
| C                    | PPIL3            | 1  | 0  | 1  | 1  | 1 | 1  | 1  | 1 |
| C                    | PPWD1            | 1  | 1  | 1  | 0  | 0 | 0  | 0  | 1 |
| C                    | WDR83            | 1  | 0  | 1  | 1  | 1 | 1  | 1  | 1 |
| DisassemblyProteins  | Ntr2             | 0  | 1  | 0  | 0  | 0 | 0  | 0  | 0 |
| DisassemblyProteins  | Prp43            | 1  | 1  | 1  | 1  | 0 | 1  | 1  | 1 |
| DisassemblyProteins  | TFIP11           | 1  | 1  | 1  | 0  | 0 | 0  | 1  | 1 |
| EarlySplicingFactors | hPRP5            | 1  | 1  | 1  | 1  | 1 | 1  | 1  | 1 |
| EarlySplicingFactors | TCERG1           | 1  | 1  | 1  | 0  | 0 | 0  | 0  | 1 |
| EJC                  | C17orf85_ELG     | 1  | 0  | 0  | 0  | 0 | 0  | 0  | 0 |
| EJC                  | DDX39B_UAP56     | 1  | 0  | 1  | 1  | 1 | 1  | 0  | 1 |
| EJC                  | EIF4A3           | 1  | 1  | 1  | 1  | 1 | 1  | 1  | 1 |
| EJC                  | MAGOH            | 1  | 0  | 1  | 0  | 0 | 0  | 1  | 1 |
| EJC                  | PNN              | 1  | 0  | 1  | 0  | 0 | 0  | 0  | 0 |
| EJC                  | RMB8A_Y14        | 1  | 0  | 1  | 1  | 1 | 0  | 1  | 1 |
| EJC                  | THOC1            | 1  | 0  | 1  | 0  | 0 | 0  | 0  | 0 |



|               |              |   |   |   |   |   |   |   |   |
|---------------|--------------|---|---|---|---|---|---|---|---|
| RES           | CGI-79       | 1 | 1 | 0 | 1 | 1 | 1 | 1 | 1 |
| RES           | MGC13125     | 1 | 1 | 1 | 0 | 0 | 0 | 0 | 1 |
| RES           | SNIP1        | 1 | 1 | 1 | 1 | 1 | 1 | 1 | 1 |
| SR            | SRSF3_SRp20  | 1 | 0 | 0 | 0 | 0 | 0 | 0 | 0 |
| SR            | SRp55        | 1 | 1 | 0 | 1 | 1 | 1 | 1 | 1 |
| SR            | SRRM1_SRm160 | 1 | 0 | 1 | 0 | 0 | 0 | 1 | 1 |
| SR            | SRSF10_SRp38 | 1 | 0 | 1 | 1 | 1 | 1 | 1 | 1 |
| SR            | SRSF1_9      | 1 | 0 | 1 | 1 | 1 | 1 | 1 | 1 |
| SR            | SRSF2_SC35   | 1 | 0 | 1 | 1 | 1 | 1 | 1 | 1 |
| SR            | SRSF7_9G8    | 1 | 0 | 1 | 1 | 1 | 1 | 1 | 1 |
| Step2Proteins | Prp16        | 1 | 1 | 1 | 1 | 0 | 1 | 1 | 1 |
| Step2Proteins | Prp17        | 1 | 1 | 1 | 1 | 1 | 1 | 1 | 1 |
| Step2Proteins | Prp18        | 1 | 1 | 1 | 0 | 0 | 0 | 1 | 1 |
| Step2Proteins | Prp22        | 1 | 1 | 1 | 0 | 0 | 0 | 0 | 1 |
| Step2Proteins | Slu7         | 1 | 1 | 1 | 0 | 0 | 0 | 1 | 1 |
| U11U12        | 20k          | 1 | 0 | 1 | 0 | 0 | 0 | 0 | 0 |
| U11U12        | 25k          | 1 | 0 | 1 | 0 | 0 | 0 | 0 | 0 |
| U11U12        | 31k          | 1 | 0 | 1 | 0 | 0 | 0 | 0 | 0 |
| U11U12        | 35kA         | 1 | 0 | 1 | 0 | 0 | 0 | 0 | 0 |
| U11U12        | 35kB         | 1 | 0 | 1 | 0 | 0 | 0 | 0 | 0 |
| U11U12        | 48k          | 1 | 0 | 1 | 0 | 0 | 0 | 0 | 0 |
| U11U12        | 59k          | 1 | 0 | 1 | 0 | 0 | 0 | 0 | 0 |
| U11U12        | 65k          | 1 | 0 | 1 | 0 | 0 | 0 | 0 | 0 |
| U1            | Luc7B1       | 1 | 1 | 1 | 0 | 0 | 0 | 1 | 1 |
| U1            | Prp39        | 0 | 1 | 1 | 0 | 0 | 0 | 1 | 1 |
| U1            | Prp40FBP11   | 1 | 1 | 1 | 0 | 0 | 0 | 0 | 1 |
| U1            | Prp42Ca      | 0 | 1 | 0 | 0 | 0 | 0 | 0 | 0 |
| U1            | Prp42Sc      | 0 | 1 | 0 | 0 | 0 | 0 | 0 | 0 |
| U1            | Snu56Sc      | 0 | 1 | 0 | 0 | 0 | 0 | 0 | 0 |
| U1            | Snu71S164    | 1 | 1 | 1 | 0 | 0 | 0 | 0 | 1 |
| U1            | TIA1         | 1 | 1 | 1 | 0 | 0 | 0 | 0 | 0 |
| U1            | U170K        | 1 | 1 | 1 | 0 | 0 | 0 | 0 | 1 |
| U1            | U1a          | 1 | 1 | 1 | 0 | 0 | 0 | 1 | 1 |
| U1            | U1c          | 1 | 1 | 1 | 0 | 0 | 0 | 1 | 1 |
| U2rel         | U2AF1_U2AF35 | 1 | 0 | 1 | 1 | 0 | 0 | 0 | 1 |
| U2rel         | U2AF2_U2AF65 | 1 | 1 | 1 | 1 | 0 | 0 | 1 | 1 |
| U2rel         | U2SURP_SR140 | 1 | 0 | 1 | 0 | 0 | 0 | 0 | 0 |
| U2            | SF3a120      | 1 | 1 | 1 | 0 | 0 | 0 | 1 | 1 |
| U2            | SF3a60       | 1 | 1 | 1 | 0 | 0 | 0 | 0 | 0 |
| U2            | SF3a66       | 1 | 1 | 1 | 1 | 0 | 0 | 0 | 1 |
| U2            | SF3b10       | 1 | 1 | 1 | 0 | 0 | 0 | 1 | 0 |
| U2            | SF3b130      | 1 | 1 | 1 | 0 | 0 | 0 | 1 | 1 |
| U2            | SF3b145      | 1 | 1 | 1 | 1 | 0 | 0 | 1 | 1 |
| U2            | SF3b14b      | 1 | 1 | 1 | 1 | 0 | 0 | 1 | 1 |
| U2            | SF3b150      | 1 | 1 | 1 | 1 | 0 | 0 | 1 | 1 |
| U2            | SF3b15.5     | 1 | 1 | 1 | 0 | 0 | 0 | 1 | 1 |
| U2            | SF3b49       | 1 | 1 | 1 | 1 | 0 | 0 | 1 | 1 |
| U2            | U2A'         | 1 | 1 | 1 | 1 | 1 | 0 | 1 | 1 |

|        |           |     |     |     |    |    |    |    |     |
|--------|-----------|-----|-----|-----|----|----|----|----|-----|
| U2     | U2B''     | 1   | 1   | 1   | 0  | 0  | 0  | 1  | 1   |
| U4U5U6 | 110K      | 1   | 1   | 1   | 0  | 0  | 0  | 1  | 1   |
| U4U5U6 | 65K       | 1   | 1   | 1   | 1  | 1  | 1  | 1  | 1   |
| U4U5U6 | hPRP38    | 1   | 1   | 1   | 1  | 0  | 0  | 1  | 1   |
| U4U5U6 | hSNU23    | 1   | 1   | 1   | 1  | 0  | 0  | 1  | 1   |
| U4U5U6 | Spp381    | 0   | 1   | 0   | 0  | 0  | 0  | 0  | 0   |
| U4U5U6 | SRPK2     | 1   | 1   | 1   | 1  | 1  | 1  | 1  | 1   |
| U4U6   | 15_5K     | 1   | 1   | 1   | 1  | 1  | 1  | 1  | 1   |
| U4U6   | 60K       | 1   | 1   | 1   | 0  | 0  | 0  | 0  | 0   |
| U4U6   | 61K       | 1   | 1   | 1   | 0  | 0  | 0  | 1  | 1   |
| U4U6   | 90K       | 1   | 1   | 1   | 0  | 0  | 0  | 0  | 1   |
| U5     | 100K      | 1   | 1   | 1   | 1  | 1  | 1  | 1  | 1   |
| U5     | 102K      | 1   | 1   | 1   | 0  | 0  | 0  | 1  | 1   |
| U5     | 116K      | 1   | 1   | 1   | 0  | 0  | 0  | 0  | 1   |
| U5     | 15K       | 1   | 1   | 1   | 1  | 1  | 1  | 1  | 1   |
| U5     | 200K      | 1   | 1   | 1   | 1  | 1  | 1  | 1  | 1   |
| U5     | 220K Prp8 | 1   | 1   | 1   | 1  | 1  | 1  | 1  | 1   |
| U5     | 52K       | 1   | 1   | 1   | 0  | 0  | 0  | 0  | 0   |
| Sm/LSm |           | 14  | 14  | 14  | 6  | 6  | 4  | 9  | 10  |
| Totals |           | 167 | 116 | 159 | 62 | 48 | 44 | 87 | 115 |
